# Supplementary material
Source: PubMed Central journal article supplement (PMC2669026)
Supplement: E09-01-0008_1.pdf [file E09-01-0008_1.pdf]

## Supplemental Materials

### FIGURE LEGENDS

#### **Figure S1. S85 phosphorylation by Cdk and requirement of ERK-dependent S85 phosphorylation for MEK-CA-induced Xe-Cdc25A degradation**

(A) Activated eggs were injected with either buffer (Control) or 18 ng of p21<sup>Cip1</sup> mRNA, reinjected 40 min later with 2 ng of Myc-Xe-Cdc25A D231A mRNA, further injected 2.5 h later with 9 ng of MEK-CA mRNA, collected at the indicated times, and analyzed for Myc-Xe-Cdc25A (D231A), phospho-S85, and phospho-ERK by immunoblotting. Note that, even in the presence of p21<sup>Cip1</sup>, the stable D231A mutant of Xe-Cdc25A undergoes continuous S85 phosphorylation after (but not before) ERK activation, indicating that this phosphorylation is ERK-dependent. (B) Activated eggs were injected with 18 ng of p21<sup>Cip1</sup> mRNA, reinjected 40 min later with 2 ng of either WT or S85A Myc-Xe-Cdc25A mRNA, further injected 2.5 h later with 9 ng of MEK-CA mRNA, and analyzed for Myc-Xe-Cdc25A (WT or S85A) and phospho-ERK by immunoblotting. Note that, even in the presence of p21<sup>Cip1</sup>, the S85A mutant of Xe-Cdc25A is significantly more stable than the WT after ERK activation, indicating that ERK-dependent S85 phosphorylation alone is sufficient for the S85 phosphorylation-dependent degradation of Xe-Cdc25A.

#### **Figure S2. Contribution of both p90rsk and ERK phosphorylations to the MEK-CA-induced degradation of human Cdc25A**

Activated eggs were injected with 2 ng of mRNA encoding Myc-human Cdc25A constructs, reinjected 2.5 h later with 9 ng of MEK-CA mRNA, and analyzed by immunoblotting with anti-Myc antibody. In the figure, RXXS:4A (S107/124/178/293A; Busino *et al.*, 2003) is a RXXS motif mutant (of human Cdc25A), corresponding to Xe-Cdc25A RXXS:4A; SP:3A (S40/88/116A; see Figure 3A) is an SP motif mutant corresponding to Xe-Cdc25A SP:4A; 7A is a double mutant of RXXS:4A and SP:3A, corresponding to Xe-Cdc25A 8A; DS/DDG is a double mutant of the DSG motif (S82A; Busino *et al.*, 2003) and the DDG motif (D220A; Kanemori *et al.*, 2005), corresponding to Xe-Cdc25A D231A. Note that both the RXXS:4A and SP:3A mutants are significantly more stable than the WT but not the 7A or DS/DDG

mutants after MEK-CA expression, suggesting that ERK activation can target human Cdc25A for SCF <sup>$\beta$ -TrCP</sup>-dependent degradation and that this degradation requires both p90rsk and ERK phosphorylations of the phosphatase.

**Figure S3. Induction of Xe-Cdc25A degradation by the p38 pathway**

Activated eggs were injected with 2 ng of Myc-Xe-Cdc25A mRNA together with or without 9 ng of Flag-tagged *Xenopus* MK2 mRNA, reinjected 2.5 h later with 9 ng of MKK6-CA mRNA, and analyzed for Myc-Xe-Cdc25A, Flag-MK2, and phospho-p38 by immunoblotting. Note that coexpression of MK2 and MKK6-CA can induce more efficient degradation of Xe-Cdc25A than expression of MKK6-CA alone, indicating that the p38 pathway can target Xe-Cdc25A for degradation via MK2. The mobility upshift of MK2 after MKK6-CA expression is probably due to its phosphorylation (or activation; Reinhardt *et al.*, 2007) by p38.

**Figure S4. ERK-dependent degradation of Cdc25A in TPA-treated human cells**

(A) HeLa cells synchronized at G1/S by double thymidine block were released, treated with 100 nM 12-O-tetradecanoyl-phorbol-13-acetate (TPA) or its solvent DMSO 5 h after the release, and, at the indicated times (after TPA treatment), subjected to immunoblotting for Cdc25A, phospho-ERK, and  $\beta$ -actin (as control). TPA treatment activates the ras/ERK pathway and thereby causes cell-cycle arrest at G2 in mammalian cells (Alblas *et al.*, 1998; Dangi *et al.*, 2006). Note that Cdc25A is rapidly degraded coincidentally with ERK phosphorylation (or activation) in TPA-treated but not control cells. (B) HeLa cells synchronized at G1/S by double thymidine block were released, treated with DMSO or 20  $\mu$ M U0126 (MEK inhibitor) 4 h after the release, retreated with DMSO or 100 nM TPA 1 h after the U0126 treatment, and 30 min later subjected to immunoblotting. Note that inhibiting ERK activation by the MEK inhibitor U0126 significantly prevented Cdc25A degradation in TPA-treated cells, indicating that ERK activation can induce Cdc25A degradation in human cells.

## References

Busino, L., Donzelli, M., Chiesa, M., Guardavaccaro, D., Ganoth, D., Dorrello, N. V., Hershko, A., Pagano, M., and Draetta, G. F. (2003). Degradation of Cdc25A by beta-TrCP during S phase and in response to DNA damage. *Nature* 426, 87-91.

Kanemori, Y., Uto, K., and Sagata, N. (2005). Beta-TrCP recognizes a previously undescribed nonphosphorylated destruction motif in Cdc25A and Cdc25B phosphatases. *Proc Natl Acad Sci USA*. 102, 6279-6284.

Reinhardt, H. C., Aslanian, A. S., Lees, J. A., and Yaffe, M. B. (2007). p53-deficient cells rely on ATM- and ATR-mediated checkpoint signaling through the p38MAPK/MK2 pathway for survival after DNA damage. *Cancer Cell* 11,175-189.

Dangi, S., Chen, F. M., and Shapiro, P. (2006). Activation of extracellular signal-regulated kinase (ERK) in G<sub>2</sub> phase delays mitotic entry through p21<sup>CIP1</sup>. *Cell Prolif.* 39, 261-279.

Alblas, J., Slager-Davidov, R., Steenbergh, P. H., Sussenbach J. S., and Burg B. (1998). The role of MAP kinase in TPA-mediated cell cycle arrest of human breast cancer cells. *Oncogene* 16, 131-139.

**A**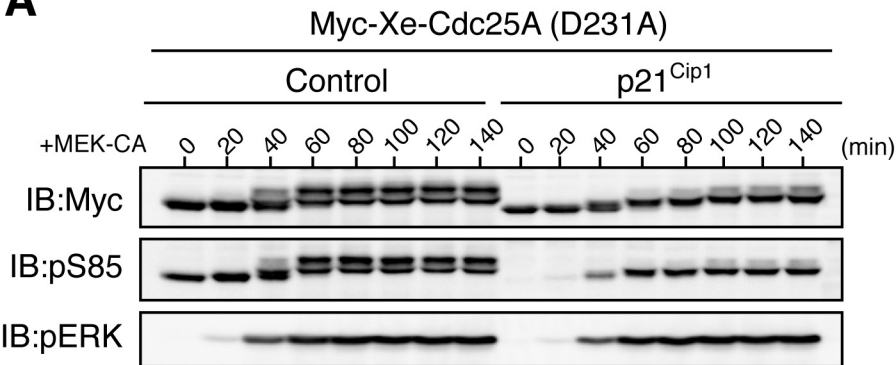**B**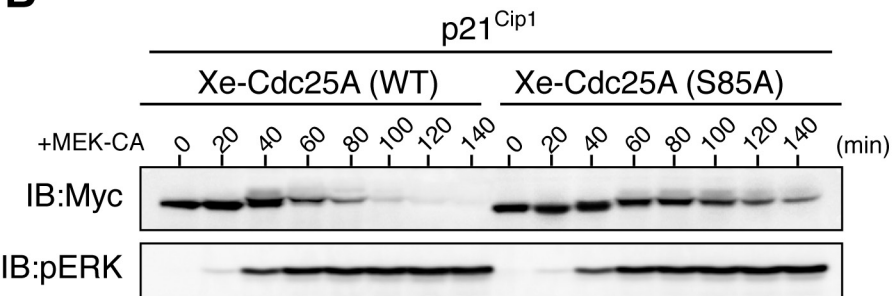**Figure S1**

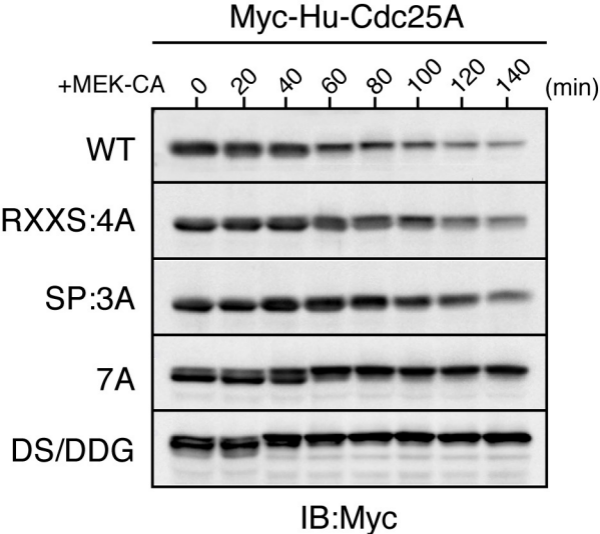

**Figure S2**

# Myc-Xe-Cdc25A

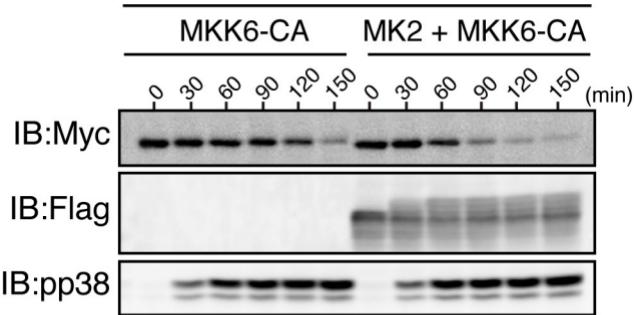

**Figure S3**

**A**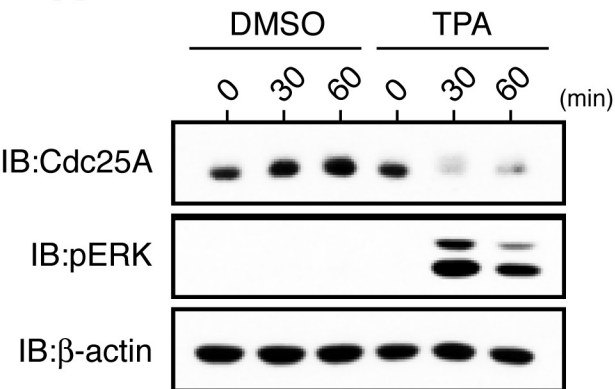**B**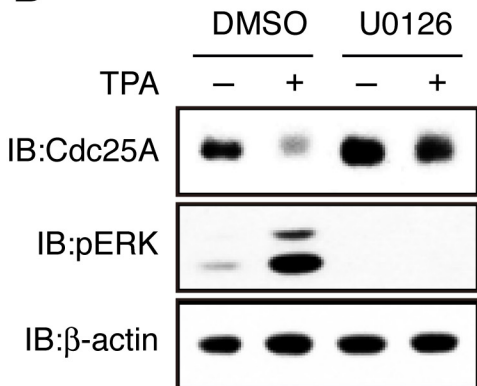**Figure S4**
